# Supplementary material
Source: PubMed Central journal article supplement (PMC1829369)
Supplement: 7601599s11.pdf [file 7601599s11.pdf]

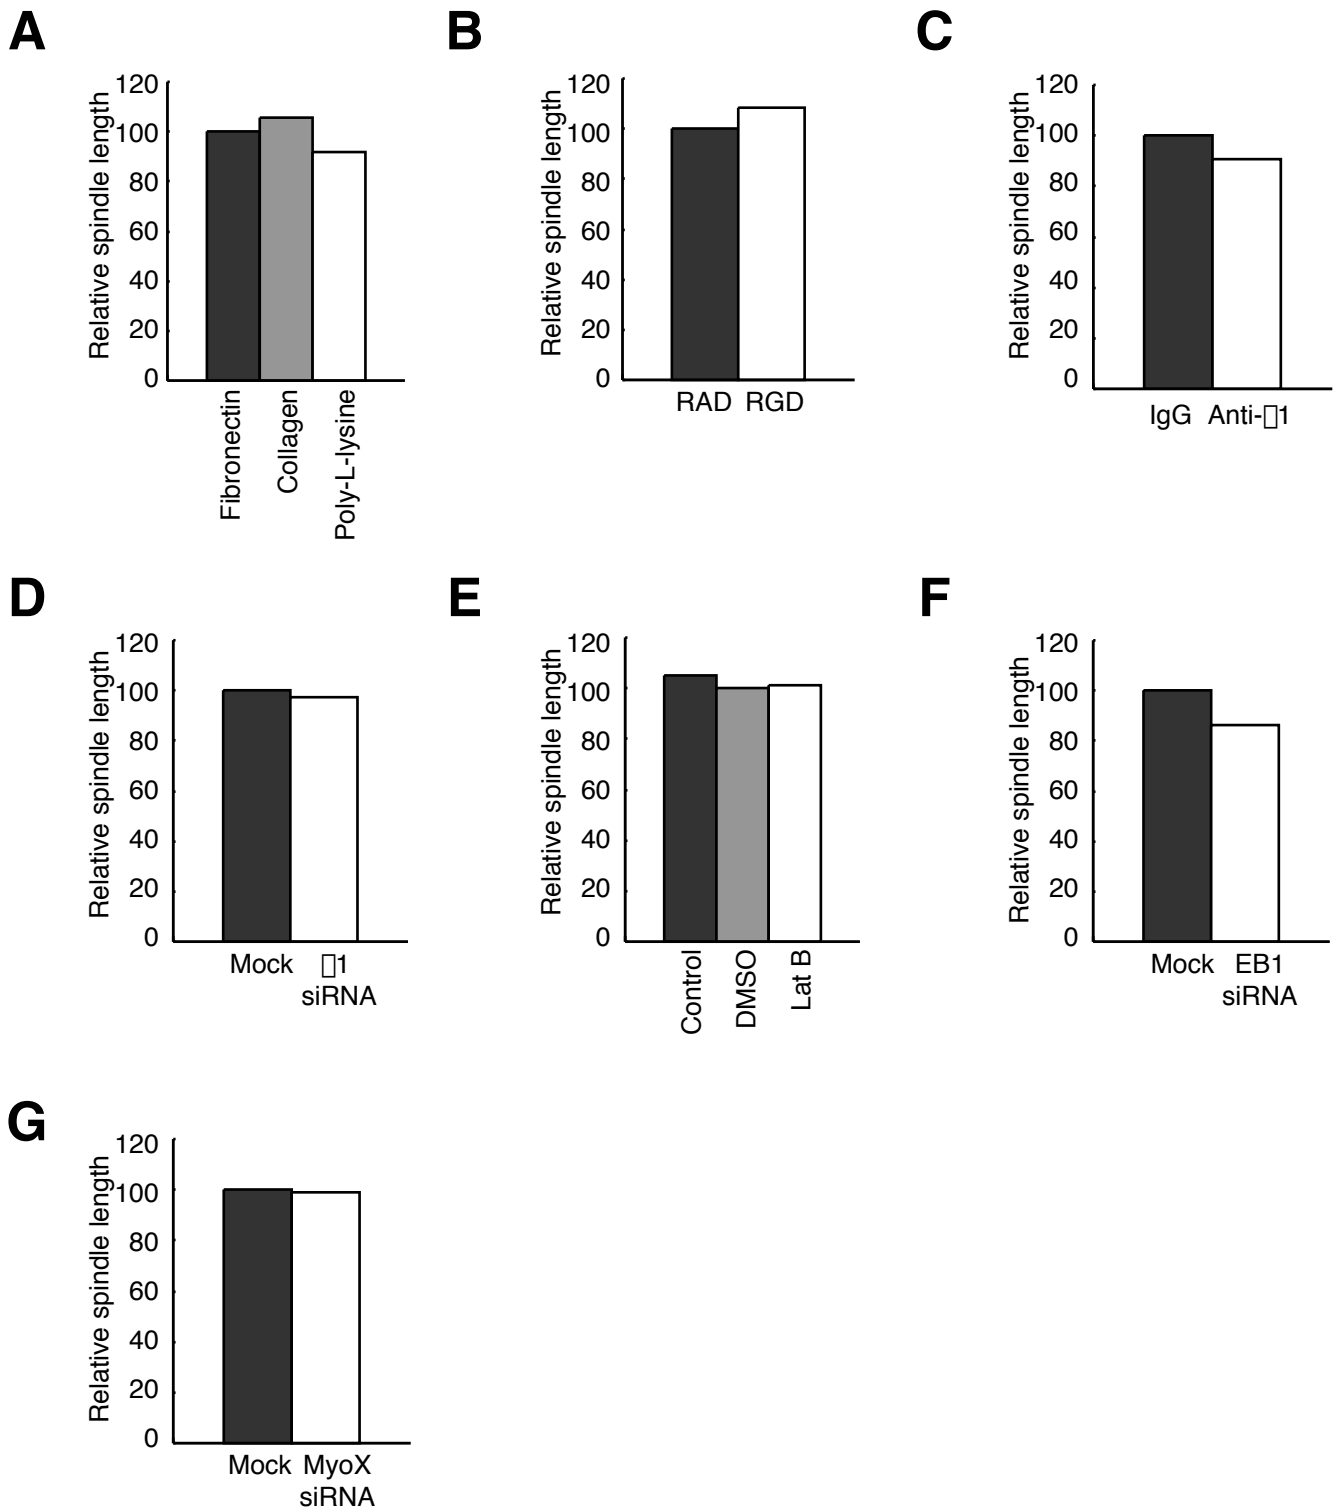

**Figure S1.** Metaphase spindle length. HeLa cells were treated as indicated and the average length of metaphase spindles were measured (n=50-100). The relative average spindle lengths to the controls are shown.
