# Supplementary material
Source: PubMed Central journal article supplement (PMC1829369)
Supplement: 7601599s12.pdf [file 7601599s12.pdf]

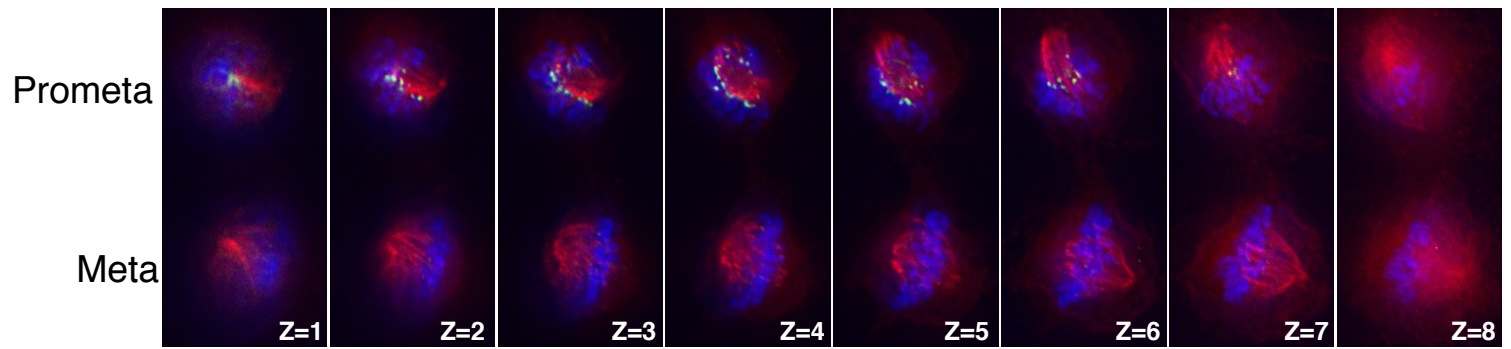

**Figure S2.** The spindle assembly of the misoriented spindle in Lat B-treated cells is intact. Z-stack images of 8 focal planes (2  $\mu$ m apart) from a Lat B-treated prometaphase cell (upper) and a Lat B-treated metaphase cell (bottom), that were immunostained with anti- $\beta$ -tubulin (red), anti-BubR1 (green) and Hoechst (blue).
