# Supplementary material
Source: PubMed Central journal article supplement (PMC1829369)
Supplement: 7601599s13.pdf [file 7601599s13.pdf]

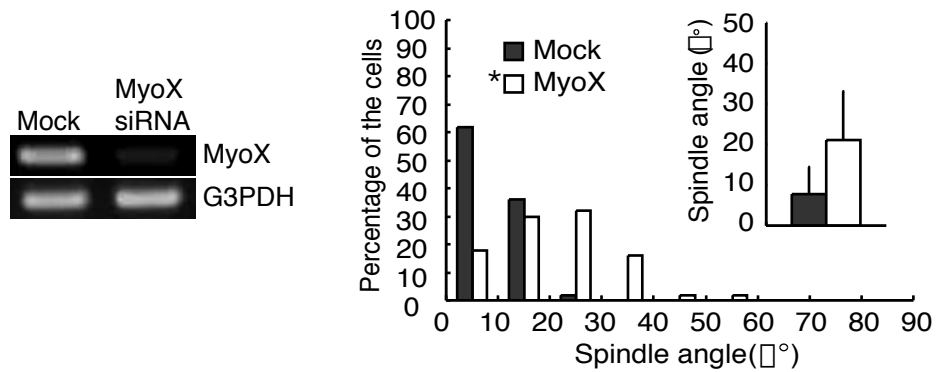

**Figure S3.** Depletion of myosin X by siRNA results in spindle misorientation. Asynchronous HeLa-S3 cells on fibronectin were transfected with or without myosin X siRNA, that targets to the region of nucleotide 3785-3805, and subjected to the spindle orientation analysis (right) (histogram; n=50, inset; mean±s.d; n=50). \*P<0.001, as compared with the mock, analyzed by F-test. Total RNA was prepared and RNA levels of myosin X and control G3PDH were analyzed by RT-PCR (left).
