# Supplementary material
Source: PubMed Central journal article supplement (PMC1829369)
Supplement: 7601599s14.pdf [file 7601599s14.pdf]

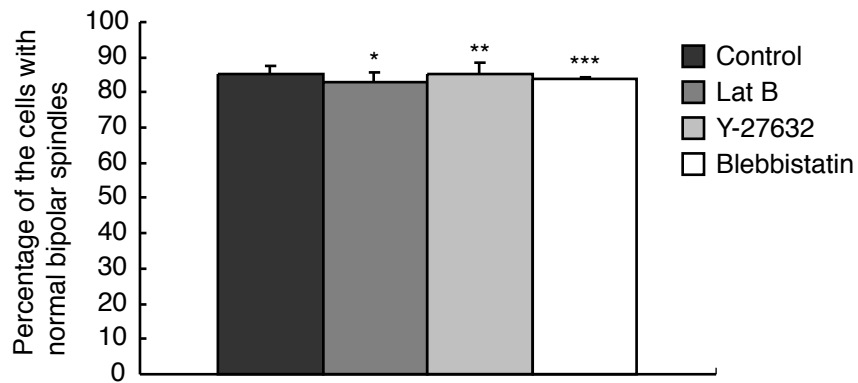

**Figure S4.** The spindle assembly is intact in the cells treated with Lat B, Y-27632, or blebbistatin. Synchronized HeLa cells on fibronectin were treated with DMSO (Control), Lat B (10  $\mu$ M), Y-27632 (50  $\mu$ M), or blebbistatin (100  $\mu$ M) for 2 h. Percentage of the mitotic cells with normal bipolar spindles in each condition is shown. More than 100 mitotic cells were analyzed in each condition, and the mean $\pm$ s.d of three analyses is shown. \*P =0.34, \*\*P =1, and \*\*\*P =0.39, as compared with control, analyzed by t-test.
