# Supplementary material
Source: PubMed Central journal article supplement (PMC1829369)
Supplement: 7601599s15.pdf [file 7601599s15.pdf]

## **Toyoshima et al.**

### **Supplementary Materials and Methods**

**Cell culture, synchronization, and reagents.** HeLa cells, HeLa-S3 cells, NIH 3T3 cells, and NRK cells were cultured in DMEM with 10 % bovine calf serum or fetal bovine calf serum. To synchronize cells in M phase, HeLa cells and NIH 3T3 cells were arrested at G1/S boundary by a double-thymidine block, released from the arrest by washing with fresh medium, and incubated for 10 h. Lat B (10  $\mu$ M, Calbiochem), Y-27632 (50  $\mu$ M, Calbiochem), and blebbistatin (100  $\mu$ M, CosmoBio) were added into the medium 8 h after the release and incubated for 2 h. MG132 (50  $\mu$ M, Calbiochem) was added into the medium 9 h after the release and incubated for 40 min, followed by the additional incubation with Lat B for 20 min. For the release from nocodazole arrest, HeLa cells were arrested in pro-metaphase by the incubation with nocodazole (80 ng/ml, Sigma) for 15 h, released from the arrest by washing with fresh medium, and incubated for 1 h. To synchronize NRK cells in M phase, cells were arrested at G1/S boundary by a 16-h treatment with aphidicolin (2.5  $\mu$ g/ml, Sigma), released from the arrest by washing with fresh medium, and incubated for 8h. Nocodazole (10 ng/ml) and Lat B were added into the medium 6 h and 7h, respectively, after the release. GRADSP peptide (400  $\mu$ M, Calbiochem), GRGDNP peptide (400  $\mu$ M, Bachem), mouse IgG (5  $\mu$ g/ml, Zymed), and anti- $\alpha$ 1 integrin,  $\alpha$ 3 integrin, and  $\alpha$ V $\beta$ 6 integrin antibodies (5  $\mu$ g/ml, Chemicon, clone 6S6, 25E11, and 10D5, respectively) were added into the medium at the time of plating of the cells on a coverslip. In all experiments, cells were plated on the fibronectin-, collagen-, or poly-L-lysine-coated coverslips. Collagen- and poly-L-lysine-coated coverslips were purchased from Asahi Techno Glass. Fibronectin-coated coverslips were purchased from BD Biosciences.

**Cell culture in three dimensions.** GFP-H2B expressing HeLa cells, synchronized by a double-thymidine block, were trypsinized immediately after the release from a double-thymidine block. Cells (5,000 cells) were suspended in 60  $\mu$ l of Matrigel Basement Membrane Matrix (BD Biosciences), and spread evenly in the well of a glass-bottom dish. The dish was placed in a cell culture incubator for 30 min to allow the basement membrane to solidify, then culture medium was added over the basement membrane. After 10 h incubation, cells were analyzed by the time-lapse observation.

**Cell staining and image analysis.** For double-staining of  $\alpha$ -tubulin and  $\beta$ -tubulin, cells were fixed for 5 min with 3.7 % formaldehyde at 37  $^{\circ}$ C, followed by incubation for 20 min with ice-cold methanol. Cells were washed twice with PBS and blocked for 1 h with 3% BSA in PBS. Cells were incubated for overnight with primary antibodies (mouse anti- $\alpha$ -tubulin and rabbit anti- $\beta$ -tubulin antibodies, Sigma), and then incubated for 1 h with secondary antibodies (AlexaFluor 594-goat anti-mouse and 488-goat anti-rabbit IgG antibodies, Molecular Probes). For detection of astral microtubules and actin cytoskeleton, cells were fixed for 15 min with 4 % paraformaldehyde in PBS at 37  $^{\circ}$ C and permeabilized for 10 min with 0.5 % Triton-X100 in PBS. For actin staining, cells were incubated for 1 h with rhodamine phalloidin (2U/ml, Sigma) at 37  $^{\circ}$ C. For membrane staining, cells were fixed for 5 min with 3.7 % formaldehyde and incubated for 30 sec with DHCC (2.5  $\mu$ g/ml, Sigma). The cell height in Figure. 4A and Figure. 5A was measured by taking Z-stack images from 0.5  $\mu$ m-thick sections of a metaphase cell, that were stained with DHCC. Images were acquired using a DeltaVision optical sectioning systems with softWoRx software. Stacks of x-y images were taken with 0.5 or 1 or 2  $\mu$ m step size. Deconvolving images and viewing the image data in 3-D (x-z projections) were performed by using softWoRx. During the acquisition of the time-lapse images, cells were grown in the medium with 20 mM Hepes (pH7.3) in glass-bottom chambers set on a temperature-controlled stage.
